# Supplementary material
Source: PubMed Central journal article supplement (PMC5550965)
Supplement: rsif20170102supp1.pdf [file rsif20170102supp1.pdf]

## Appendix A

1 This appendix provides further details of the derivation of the analytical  
 2 solution for the diffusion equation in the inner domain  $\Omega_1$ , that is given in  
 3 equation (16).

4 It is convenient to first introduce the nondimensionalization,

$$\hat{u} = 1 - \frac{c}{c_s} \quad \hat{r} = r \frac{h}{D} \quad \hat{s} = s \frac{D}{R_1^2} \quad \hat{\beta} = h \frac{R_1}{D}. \quad (\text{A-1})$$

5 Using the definitions in (A-1), the equation for radial diffusion (11), the  
 6 boundary condition on  $\Gamma_1$  (14), and the initial condition (13) can be written  
 7 as,

$$\begin{cases} \frac{\partial \hat{u}}{\partial \hat{s}} = \hat{\beta}^2 \frac{1}{\hat{r}} \frac{\partial}{\partial \hat{r}} \left( \hat{r} \frac{\partial \hat{u}}{\partial \hat{r}} \right) & \hat{r} \in [0, \hat{\beta}] \text{ and } \hat{s} > 0, \\ \frac{\partial \hat{u}}{\partial \hat{r}} = -\hat{u} & \text{at } \hat{r} = \hat{\beta}, \quad \hat{s} > 0, \\ \hat{u}(\hat{r}, 0) = 1, & \hat{r} \in [0, \hat{\beta}], \quad \hat{s} = 0, \end{cases} \quad (\text{A-2})$$

8 Using standard methods of separation of variables (see, for example, Carslaw  
 9 and Jaeger [46]), we look for a factorized solution  $\hat{u} = \hat{T}(\hat{s})\hat{R}(\hat{r})$  for (A-2),  
 10 from which it follows, that  $\hat{T}(\hat{s})$  and  $\hat{R}(\hat{r})$  must satisfy

$$\hat{T}' + \alpha^2 \hat{\beta}^2 \hat{T} = 0, \quad \hat{R}'' + \frac{1}{\hat{r}} \hat{R}' + \alpha^2 \hat{R} = 0, \quad (\text{A-3})$$

11 for  $\hat{s} > 0$  and  $\hat{r} \in [0, \hat{\beta}]$ , where  $\alpha^2$  is a positive, real constant and we have used  
 12 the “” notation to denote differentiation with respect to the independent  
 13 variable. The well known solutions to (A-3) are

$$\hat{T} = A e^{-\alpha^2 \hat{\beta}^2 \hat{s}}, \quad \hat{R} = B J_0(\alpha \hat{r}) \quad (\text{A-4})$$

14 where we have imposed the boundedness of the solution at  $\hat{r} = 0$ . The  
 15 equation for  $\hat{R}(\hat{r})$  in (A-3) is a (singular), Sturm-Liouville problem, where

$$L[\hat{R}] \equiv (\hat{r} \hat{R}')' \quad (\text{A-5})$$

16 with corresponding differential equation and boundary conditions,

$$\begin{aligned} L[\hat{R}] &= -\alpha^2 \hat{r} \hat{R} & \hat{r} &\in [0, \hat{\beta}] \\ \hat{R}' + \hat{R} &= 0 & \text{at } \hat{r} &= \hat{\beta}. \end{aligned} \quad (\text{A-6})$$

17 The Lagrange identity holds for this singular problem (A-6) (e.g. page 659  
 18 Boyce and DiPrima) [47], and we therefore have the completeness of the set

19 of eigenfunctions  $\hat{R}(\hat{r})$  in the appropriate function space, so the solution  $\hat{u}$   
 20 can be represented as the following series

$$\hat{u} = \sum_{n=1}^{\infty} A_n e^{-\alpha_n^2 \hat{\beta}^2 \hat{s}} J_0(\alpha_n \hat{r}). \quad (\text{A-7})$$

21 Applying the boundary condition given in (A-2) on surface  $\Gamma_1$  ( $\hat{r} = \hat{\beta}$ ), we  
 22 obtain,

$$\sum_{n=1}^{\infty} A_n e^{-\alpha_n^2 \hat{\beta}^2 \hat{s}} [J_0(\alpha_n \hat{\beta}) - \alpha_n J_1(\alpha_n \hat{\beta})] = 0 \quad (\text{A-8})$$

23 and therefore,  $\alpha_n$  are the the roots of

$$J_0(\alpha_n \hat{\beta}) - \alpha_n J_1(\alpha_n \hat{\beta}) = 0 \quad n = 1, 2, 3 \dots \quad (\text{A-9})$$

24 Using the initial condition  $\hat{u} = 1$  at  $\hat{s} = 0$  in (A-7), it follows that,

$$\sum_{n=1}^{\infty} A_n J_0(\alpha_n \hat{r}) = 1 \quad (\text{A-10})$$

25 and therefore,

$$\sum_{n=1}^{\infty} \int_0^{\hat{\beta}} A_n J_0(\alpha_n \hat{r}) J_0(\alpha_m \hat{r}) \hat{r} d\hat{r} = \int_0^{\hat{\beta}} J_0(\alpha_m \hat{r}) \hat{r} d\hat{r}, \quad m = 1, 2, 3, \dots \quad (\text{A-11})$$

26 Using well known orthogonality properties of the solution with (A-9),

$$\int_0^{\hat{\beta}} J_0(\alpha_n \hat{r}) J_0(\alpha_m \hat{r}) \hat{r} d\hat{r} = \begin{cases} 0 & m \neq n \\ \frac{\hat{\beta}^2 (1 + \alpha_n^2)}{2\alpha_n^2} J_0^2(\alpha_n \hat{\beta}) & m = n \end{cases} \quad (\text{A-12})$$

27 and hence,

$$A_n = \int_0^{\hat{\beta}} J_0(\alpha_n \hat{r}) \hat{r} d\hat{r} / \int_0^{\hat{\beta}} J_0^2(\alpha_n \hat{r}) \hat{r} d\hat{r} \quad (\text{A-13})$$

28 It follows from standard integral results for Bessels functions and (A-9) that

$$\int_0^{\hat{\beta}} J_0(\alpha_n \hat{r}) \hat{r} d\hat{r} = \frac{\hat{\beta}}{\alpha_n} J_1(\alpha_n \hat{\beta}) = \frac{\hat{\beta}}{\alpha_n^2} J_0(\alpha_n \hat{\beta}) \quad (\text{A-14})$$

29 Using this last result with (A-12) in (A-13), we obtain the solution for  $\hat{u}$  in  
 30  $\Omega_1$  (see, e.g. page 201 of Carslaw and Jaeger) [46],

$$\hat{u} = \sum_{n=1}^{\infty} \frac{2 J_0(\alpha_n \hat{r})}{\hat{\beta} (1 + \alpha_n^2) J_0(\alpha_n \hat{\beta})} e^{-\alpha_n^2 \hat{\beta}^2 \hat{s}} \quad \hat{r} \in [0, \hat{\beta}] \quad \text{and} \quad \hat{s} > 0 \quad (\text{A-15})$$

31 Using the definitions in (A-1), the solution for the concentration given in  
 32 equation (16) is obtained.

## 33 Appendix B

34 This appendix provides further details of the derivation of the analytical  
 35 solution given in equation (25) for radial diffusion in the outer domain  $\Omega_2$ .  
 36 It is useful to first write the equations in dimensionless form. Using the  
 37 following non-dimensionalization

$$\hat{u} = 1 - \frac{c}{c_s} \quad \hat{r} = r \frac{h}{D} \quad \hat{s} = s \frac{D}{R_2^2} \quad \hat{\beta} = h \frac{R_2}{D} \quad \gamma = \frac{R_2}{R_3} \quad (\text{B-16})$$

38 the system of equations for the outer domain can be written as,

$$\left\{ \begin{array}{ll} \frac{\partial \hat{u}}{\partial \hat{s}} = \hat{\beta}^2 \frac{1}{\hat{r}} \frac{\partial}{\partial \hat{r}} \left( \hat{r} \frac{\partial \hat{u}}{\partial \hat{r}} \right) & \hat{r} \in [\hat{\beta}, \hat{\beta}/\gamma] \quad \hat{s} > 0, \\ \frac{\partial \hat{u}}{\partial \hat{r}} = \hat{u} & \text{at } \hat{r} = \hat{\beta}, \quad \hat{s} > 0, \\ \frac{\partial \hat{u}}{\partial \hat{r}} = 0 & \text{at } \hat{r} = \hat{\beta}/\gamma, \quad \hat{s} > 0, \\ \hat{u}(\hat{r}, 0) = 1, & \hat{r} \in [0, \hat{\beta}]. \end{array} \right. \quad (\text{B-17})$$

39 As for the solution in the inner domain (Appendix A), the classical method  
 40 of separation of variables is used and we look for a solution of the form  
 41  $\hat{u} = \hat{T}(\hat{s})\hat{R}(\hat{r})$ . It follows from (B-17) that

$$\hat{T}(\hat{t}) = Ae^{-\alpha^2 \hat{\beta}^2 \hat{s}}, \quad \hat{R}(\hat{r}) = AJ_0(\alpha \hat{r}) + BY_0(\alpha \hat{r}) \quad (\text{B-18})$$

42 where  $\alpha$  is once again a real, positive constant. Hence, the solution for  $\hat{u}$  in  
 43 the outer domain  $\Omega_2$  is

$$\hat{u} = \sum_{n=1}^{\infty} [A_n J_0(\alpha_n \hat{r}) + B_n Y_0(\alpha_n \hat{r})] e^{-\alpha_n^2 \hat{\beta}^2 \hat{s}} \quad (\text{B-19})$$

44 Applying the boundary condition at the outer boundary,  $\Gamma_3$  ( $\hat{r} = \hat{\beta}/\gamma$ ) given  
 45 in (B-17), it follows that,

$$A_n \alpha_n J_1\left(\alpha_n \frac{\hat{\beta}}{\gamma}\right) + B_n \alpha_n Y_1\left(\alpha_n \frac{\hat{\beta}}{\gamma}\right) = 0, \quad n = 1, 2, 3, \dots \quad (\text{B-20})$$

46 It is useful to define the function,  $\phi_0(\alpha_n \hat{r})$ , as a linear combination of  $J_0(\alpha_n \hat{r})$   
 47 and  $Y_0(\alpha_n \hat{r})$

$$\phi_0(\alpha_n \hat{r}) \doteq J_0(\alpha_n \hat{r}) Y_1\left(\alpha_n \frac{\hat{\beta}}{\gamma}\right) - Y_0(\alpha_n \hat{r}) J_1\left(\alpha_n \frac{\hat{\beta}}{\gamma}\right) \quad (\text{B-21})$$

48 Using (B-20) to eliminate  $B_n$  in (B-19) and using the notation in (B-21), we  
 49 have

$$\hat{u} = \sum_{n=1}^{\infty} C_n \phi_0(\alpha_n \hat{r}) e^{-\alpha_n^2 \hat{\beta}^2 \hat{s}} \quad (\text{B-22})$$

50 It follows from (B-22) and (B-17) that  $\phi_0(\alpha_n \hat{r})$  are eigenfunctions that satisfy

$$\begin{aligned} (\hat{r}\phi_0')' &= -\alpha^2 \hat{r}\phi_0 & \hat{r} &\in [\hat{\beta}, \hat{\beta}/\gamma] \\ \phi_0' - \phi_0 &= 0 & \text{at } \hat{r} &= \hat{\beta} \\ \phi_0' &= 0 & \text{at } \hat{r} &= \hat{\beta}/\gamma. \end{aligned} \quad (\text{B-23})$$

51 Applying the boundary condition at  $\Gamma_2$  ( $\hat{r} = \hat{\beta}$ ) given in (B-23)<sub>2</sub> with (B-21),  
 52 we obtain an equation for the eigenvalues  $\alpha_n$  as the roots of,

$$\begin{aligned} \alpha_n J_1(\alpha_n \hat{\beta}) Y_1(\alpha_n \frac{\hat{\beta}}{\gamma}) - \alpha_n Y_1(\alpha_n \hat{\beta}) J_1(\alpha_n \frac{\hat{\beta}}{\gamma}) \\ = J_0(\alpha_n \hat{\beta}) Y_1(\alpha_n \frac{\hat{\beta}}{\gamma}) - Y_0(\alpha_n \hat{\beta}) J_1(\alpha_n \frac{\hat{\beta}}{\gamma}). \end{aligned} \quad (\text{B-24})$$

53 Applying the initial condition  $\hat{u} = 1$  at  $t = 0$  to the solution (B-22)

$$\sum_{n=1}^{\infty} C_n \phi_0(\alpha_n \hat{r}) = 1. \quad (\text{B-25})$$

54 Therefore from (B-25)

$$\sum_{n=1}^{\infty} \int_{\hat{\beta}}^{\frac{\hat{\beta}}{\gamma}} C_n \phi_0(\alpha_n \hat{r}) \phi_0(\alpha_m \hat{r}) \hat{r} d\hat{r} = \int_{\hat{\beta}}^{\frac{\hat{\beta}}{\gamma}} \phi_0(\alpha_m \hat{r}) \hat{r} d\hat{r}. \quad (\text{B-26})$$

55 The eigenfunctions  $\phi_0(\alpha_n \hat{r})$  are linear combinations of bessel functions  $J_0(\alpha_n \hat{r})$   
 56 and  $Y_0(\alpha_n \hat{r})$  and are orthogonal, so that from (B-26),

$$C_n = \int_{\hat{\beta}}^{\frac{\hat{\beta}}{\gamma}} \phi_0(\alpha_n \hat{r}) \hat{r} d\hat{r} \Big/ \int_{\hat{\beta}}^{\frac{\hat{\beta}}{\gamma}} \phi_0^2(\alpha_n \hat{r}) \hat{r} d\hat{r}. \quad (\text{B-27})$$

57 Making use of (B-23), the following simplifications follow for the integral in  
 58 (B-27)

$$\begin{aligned} \int_{\hat{\beta}}^{\frac{\hat{\beta}}{\gamma}} \phi_0(\alpha_n \hat{r}) \hat{r} d\hat{r} &= -\frac{1}{\alpha_n^2} \int_{\hat{\beta}}^{\frac{\hat{\beta}}{\gamma}} (\hat{r}\phi_0')' d\hat{r} = -\frac{1}{\alpha_n^2} \left[ \frac{\hat{\beta}}{\gamma} \phi_0'(\alpha_n \frac{\hat{\beta}}{\gamma}) - \hat{\beta} \phi_0'(\alpha_n \hat{\beta}) \right] \\ &= \frac{\hat{\beta}}{\alpha_n^2} \phi_0(\alpha_n \hat{\beta}) \end{aligned} \quad (\text{B-28})$$

59 and, after multiplying (B-23)<sub>1</sub> by the quantity  $(2r\phi')$ , rearranging terms  
 60 and integrating over the domain, we obtain,

$$\int_{\hat{\beta}}^{\frac{\hat{\beta}}{\gamma}} \phi_0^2(\alpha_n \hat{r}) \hat{r} d\hat{r} = \left[ \frac{\hat{r}^2}{2\alpha_n^2} \left( (\phi_0'(\alpha_n \hat{r}))^2 + \alpha_n^2 \phi_0^2(\alpha_n \hat{r}) \right) \right]_{\hat{\beta}}^{\frac{\hat{\beta}}{\gamma}} \quad (\text{B-29})$$

61

$$= \frac{\hat{\beta}^2}{2} \left[ \frac{1}{\gamma^2} \phi_0^2(\alpha_n \frac{\hat{\beta}}{\gamma}) - \phi_0^2(\alpha_n \hat{\beta}) (1 + \frac{1}{\alpha_n^2}) \right] \quad (\text{B-30})$$

62 Using these last two results with (B-27), it follows that the solution for  $\hat{u}$  in  
 63 the outer domain  $\Omega_2$  is

$$\hat{u} = \sum_{n=1}^{\infty} C_n \phi_0(\alpha_n \hat{r}) e^{-\alpha_n^2 \hat{\beta}^2 \hat{s}} \quad (\text{B-31})$$

64 with

$$C_n = \frac{2\phi_0(\alpha_n \hat{\beta})}{\hat{\beta} \left[ \alpha_n^2 \phi_0^2(\alpha_n \frac{\hat{\beta}}{\gamma}) / \gamma^2 - (1 + \alpha_n^2) \phi_0^2(\alpha_n \hat{\beta}) \right]} \quad (\text{B-32})$$

where it should be recalled that  $\alpha_n$  can be determined through (B-24) and  $\phi_n(\alpha_n \hat{r})$  is defined in (B-21).
